# Supplementary material for: Development of an Instrument to Evaluate the Intake of Liquids, Food and Supplements in Endurance Competitions: Nutritional Intake Questionnaire for Endurance Competitions—NIQEC
Source: MDPI journal article supplement (doi:10.3390/nu15081969), 2023-04-19
Supplement: s1 [file s1]

Table S1: Sociodemographic data of accredited D-N and athletes specialized in endurance sports participating in phases 1 and 3 (Focus Groups and Delphi survey).

| Accredited D-N   |       |                     | Athletes         |       |                     |
|------------------|-------|---------------------|------------------|-------|---------------------|
| Demographic data | Sex   | Years of experience | Demographic data | Sex   | Years of experience |
| Participant 1    | Woman | 4                   | Participant 1    | Man   | 8                   |
| Participant 2    | Man   | 5                   | Participant 2    | Woman | 15                  |
| Participant 3    | Man   | 2                   | Participant 3    | Man   | 5                   |
| Participant 4    | Man   | 6                   | Participant 4    | Woman | 8                   |
| Participant 5    | Woman | 9                   | Participant 5    | Man   | 18                  |
| Participant 6    | Man   | 4                   | Participant 6    | Man   | 10                  |
| Participant 7    | Man   | 8                   | Participant 7    | Woman | 7                   |
| Participant 8    | Man   | 5                   | Participant 8    | Man   | 5                   |
| Participant 9    | Woman | 10                  | Participant 9    | Woman | 4                   |
| Participant 10   | Man   | 7                   | Participant 10   | Man   | 7                   |
| Participant 11   | Woman | 12                  | Participant 11   | Man   | 4                   |
| Participant 12   | Woman | 5                   | Participant 12   | Man   | 6                   |
| Participant 13   | Man   | 4                   | Participant 13   | Man   | 15                  |
| Participant 14   | Man   | 8                   | Participant 14   | Woman | 25                  |
| Participant 15   | Man   | 11                  | Participant 15   | Man   | 25                  |
| Participant 16   | Man   | 6                   |                  |       |                     |
| Participant 17   | Man   | 12                  |                  |       |                     |

Table S2. Map of codes and coherencies of demographic data for the proposal for online questionnaire validation for endurance events.

| RESEARCH QUESTIONS                                                                 | THEME                    | METACODES                                                                                                   | CODES                                  | SUBCODES                          |
|------------------------------------------------------------------------------------|--------------------------|-------------------------------------------------------------------------------------------------------------|----------------------------------------|-----------------------------------|
| What questions would you ask to find out the sociodemographic data of the athlete? | A. Sociodemographic data | A1. Questions referring to demographic data from the point of view of professional dietitians-nutritionists | A1.1 Sex                               | A 1.1.1 Woman                     |
|                                                                                    |                          |                                                                                                             |                                        | A 1.1.2 Man                       |
|                                                                                    |                          |                                                                                                             | A1.2 Birthdate                         | A 1.2 Day, month and year number  |
|                                                                                    |                          |                                                                                                             | A1.3 Age                               | A 1.3 Years in number             |
|                                                                                    |                          |                                                                                                             | A1.4 Autonomous Community of residence | A 1.4.1 Andalusía                 |
|                                                                                    |                          |                                                                                                             |                                        | A.1.4.2 Catalonia                 |
|                                                                                    |                          |                                                                                                             |                                        | A.1.4.3 Community of Madrid       |
|                                                                                    |                          |                                                                                                             |                                        | A.1.4.4 Valencian Community       |
|                                                                                    |                          |                                                                                                             |                                        | A.1.4.5 Galician                  |
|                                                                                    |                          |                                                                                                             |                                        | A.1.4.6 Castile and Leon          |
|                                                                                    |                          |                                                                                                             |                                        | A.1.4.7 Basque Country            |
|                                                                                    |                          |                                                                                                             |                                        | A.1.4.8 Canary Islands            |
|                                                                                    |                          |                                                                                                             |                                        | A.1.4.9 Castilla La Mancha        |
|                                                                                    |                          |                                                                                                             |                                        | A.1.4.10 Region of Murcia         |
|                                                                                    |                          |                                                                                                             |                                        | A.1.4.11 Aragon                   |
|                                                                                    |                          |                                                                                                             |                                        | A.1.4.12 Balearic Islands         |
|                                                                                    |                          |                                                                                                             |                                        | A.1.4.13 Extremadura              |
|                                                                                    |                          |                                                                                                             |                                        | A.1.4.14 Principality of Asturias |
|                                                                                    |                          |                                                                                                             |                                        | A.1.4.15 Navarre                  |
|                                                                                    |                          |                                                                                                             |                                        | A.1.4.16 Cantabria                |
|                                                                                    |                          |                                                                                                             |                                        | A.1.4.17 La Rioja                 |
|                                                                                    |                          |                                                                                                             |                                        | A.1.4.18 Melilla                  |
|                                                                                    |                          |                                                                                                             |                                        | A.1.4.19 Ceuta                    |
|                                                                                    |                          |                                                                                                             | A1.5 Height                            | A.1.5 Centimetres in numbers      |
|                                                                                    |                          |                                                                                                             | A1.6 Current Weight                    | A.1.6 Kilograms in numbers        |
|                                                                                    |                          | A.2. Questions referring to demographic data from the point of view of the athletes                         | A2.1 Sex                               | A 2.1.1 Woman                     |
|                                                                                    |                          |                                                                                                             |                                        | A 2.1.2 Man                       |
|                                                                                    |                          |                                                                                                             | A2.2 Birthdate                         | A 2.2 Day, month and year number  |
|                                                                                    |                          |                                                                                                             | A2.3 Age                               | A 2.3 Número en Años              |
|                                                                                    |                          |                                                                                                             | A2.4 Autonomous Community of residence | A 2.3 Years in number             |
|                                                                                    |                          |                                                                                                             |                                        | A 2.4.1 Andalusía                 |
|                                                                                    |                          |                                                                                                             |                                        | A.2.4.2 Catalonia                 |
|                                                                                    |                          |                                                                                                             |                                        | A.2.4.3 Community of Madrid       |
|                                                                                    |                          |                                                                                                             |                                        | A.2.4.4 Valencian Community       |
|                                                                                    |                          |                                                                                                             |                                        | A.2.4.5 Galician                  |
|                                                                                    |                          |                                                                                                             |                                        | A.2.4.6 Castile and Leon          |
|                                                                                    |                          |                                                                                                             |                                        | A.2.4.7 Basque Country            |
|                                                                                    |                          |                                                                                                             |                                        | A.2.4.8 Canary Islands            |
|                                                                                    |                          |                                                                                                             |                                        | A.2.4.9 Castilla La Mancha        |

|  |  |  |                     |                                   |
|--|--|--|---------------------|-----------------------------------|
|  |  |  |                     | A.2.4.10 Region of Murcia         |
|  |  |  |                     | A.2.4.11 Aragon                   |
|  |  |  |                     | A.2.4.12 Balearic Islands         |
|  |  |  |                     | A.2.4.13 Estremadura              |
|  |  |  |                     | A.2.4.14 Principality of Asturias |
|  |  |  |                     | A.2.4.15 Navarre                  |
|  |  |  |                     | A.2.4.16 Cantabria                |
|  |  |  |                     | A.2.4.17 La Rioja                 |
|  |  |  |                     | A.2.4.18 Melilla                  |
|  |  |  | A2.5 Height         | A.2.4.19 Ceuta                    |
|  |  |  | A2.6 Current Weight | A.2.5 Centimetres in numbers      |

Table S3. Map of codes and coherencies of Sports data for the proposal for online questionnaire validation for endurance events.

| RESEARCH QUESTIONS                                                        | THEME          | METACODES                                                                                        | CODES                                               | SUBCODES                                                           |
|---------------------------------------------------------------------------|----------------|--------------------------------------------------------------------------------------------------|-----------------------------------------------------|--------------------------------------------------------------------|
| What questions would you ask to find out the sports data of the athletes? | B. Sports data | B1. Questions referring to sports data from the point of view of expert dietitians-nutritionists | B1.1 Main competition sport                         | B1.1.1 Mountain biking or MTB                                      |
|                                                                           |                |                                                                                                  |                                                     | B1.1.2 Open-water swimming                                         |
|                                                                           |                |                                                                                                  |                                                     | B1.1.3 Half marathon                                               |
|                                                                           |                |                                                                                                  |                                                     | B1.1.4 Marathon                                                    |
|                                                                           |                |                                                                                                  |                                                     | B1.1.5 Ultramarathon                                               |
|                                                                           |                |                                                                                                  |                                                     | B1.1.6 Mountain running                                            |
|                                                                           |                |                                                                                                  |                                                     | B1.1.7 Duathlon                                                    |
|                                                                           |                |                                                                                                  |                                                     | B1.1.8 Triathlon                                                   |
|                                                                           |                |                                                                                                  | B1.2 Number of training sessions per week           | B1.2.1 1 time per week                                             |
|                                                                           |                |                                                                                                  |                                                     | B1.2.2 2 times per week                                            |
|                                                                           |                |                                                                                                  |                                                     | B1.2.3 3 times per week                                            |
|                                                                           |                |                                                                                                  |                                                     | B1.2.4 4 times per week                                            |
|                                                                           |                |                                                                                                  |                                                     | B1.2.5 5 times per week                                            |
|                                                                           |                |                                                                                                  |                                                     | B1.2.6 6 times per week                                            |
|                                                                           |                |                                                                                                  |                                                     | B1.2.7 7 times per week                                            |
|                                                                           |                |                                                                                                  |                                                     | B1.2.8 8 times per week                                            |
|                                                                           |                |                                                                                                  |                                                     | B1.2.9 >8 times per week                                           |
|                                                                           |                |                                                                                                  | B1.3 Performing 2 or more training sessions per day | B1.3.1 Yes                                                         |
|                                                                           |                |                                                                                                  |                                                     | B1.3.2 No                                                          |
|                                                                           |                |                                                                                                  | B 1.4 Hours of training per week                    | B1.4.1 Hours in numbers                                            |
|                                                                           |                |                                                                                                  | B 1.5 Years practicing the sport                    | B 1.5.1 Years in numbers                                           |
|                                                                           |                |                                                                                                  | B1.6 Federated                                      | B1.6.1 Yes                                                         |
|                                                                           |                |                                                                                                  |                                                     | B1.6.2 No                                                          |
|                                                                           |                |                                                                                                  | B1.7 Competition level                              | B1.7.1 National                                                    |
|                                                                           |                |                                                                                                  |                                                     | B1.7.2 International                                               |
|                                                                           |                |                                                                                                  | B1.8 Race number                                    | B.1.8.1 Race number in the competition                             |
|                                                                           |                |                                                                                                  | B1.9 Distance of the event performed                | B1.9.1 Kilometers in numbers                                       |
|                                                                           |                |                                                                                                  | B1.10 Event completion time                         | B1.10.1 Hours, minutes and seconds in numbers                      |
|                                                                           |                |                                                                                                  | B1.11 In case you haven't finished the event        | B1.11.1 Motives or reasons in case of not having finished the test |
|                                                                           |                |                                                                                                  |                                                     |                                                                    |
|                                                                           |                | B2. Questions referring to sports data from the point of view of the athletes                    | B2.1 Main competition sport                         | B2.1.1 Mountain biking or MTB                                      |
|                                                                           |                |                                                                                                  |                                                     | B2.1.2 Open-water swimming                                         |
|                                                                           |                |                                                                                                  |                                                     | B2.1.3 Half marathon                                               |
|                                                                           |                |                                                                                                  |                                                     | B2.1.4 Marathon                                                    |
|                                                                           |                |                                                                                                  |                                                     | B2.1.5 Ultramarathon                                               |
|                                                                           |                |                                                                                                  |                                                     | B2.1.6 Mountain running                                            |
|                                                                           |                |                                                                                                  |                                                     | B2.1.7 Duathlon                                                    |
|                                                                           |                |                                                                                                  |                                                     | B2.1.8 Triathlon                                                   |
|                                                                           |                |                                                                                                  | B2.2 Number of training sessions per week           | B2.2.1 1 time per week                                             |
|                                                                           |                |                                                                                                  |                                                     |                                                                    |

|  |  |  |                                                     |                                                                    |
|--|--|--|-----------------------------------------------------|--------------------------------------------------------------------|
|  |  |  |                                                     | B2.2.2 2 times per week                                            |
|  |  |  |                                                     | B2.2.3 3 times per week                                            |
|  |  |  |                                                     | B2.2.4 4 times per week                                            |
|  |  |  |                                                     | B2.2.5 5 times per week                                            |
|  |  |  |                                                     | B2.2.6 6 times per week                                            |
|  |  |  |                                                     | B2.2.7 7 times per week                                            |
|  |  |  |                                                     | B2.2.8 8 times per week                                            |
|  |  |  |                                                     | B2.2.9 >8 times per week                                           |
|  |  |  | B2.3 Performing 2 or more training sessions per day | B2.3.1 Yes                                                         |
|  |  |  |                                                     | B2.3.2 No                                                          |
|  |  |  | B2.4 Hours of training per week                     | B2.4.1 Hours in numbers                                            |
|  |  |  | B2.5 Years practicing the sport                     | B2.5.1 Years in numbers                                            |
|  |  |  | B2.6 Federated                                      | B2.6.1 Yes                                                         |
|  |  |  |                                                     | B2.6.2 No                                                          |
|  |  |  | B2.7 Competition level                              | B2.7.1 National                                                    |
|  |  |  |                                                     | B2.7.2 International                                               |
|  |  |  | B2.8 Race number                                    | B2.8.1 Race number in the competition                              |
|  |  |  | B2.9 Distance of the event performed                | B2.9.1 Kilometers in numbers                                       |
|  |  |  | B2.10 Event completion time                         | B2.10.1 Hours, minutes and seconds in numbers                      |
|  |  |  | B2.11 In case you haven't finished the event        | B2.11.1 Motives or reasons in case of not having finished the test |

Table S4. Map of codes and coherencies of Consumption of food, liquids and supplements during the hour before, during and in the hour after the competition for the proposal for online questionnaire validation for endurance events.

| RESEARCH QUESTIONS                                                                                                            | THEME                                                                                     | METACODES                                                                                                                                                       | CODES                                                            | SUBCODES                                                                                 |
|-------------------------------------------------------------------------------------------------------------------------------|-------------------------------------------------------------------------------------------|-----------------------------------------------------------------------------------------------------------------------------------------------------------------|------------------------------------------------------------------|------------------------------------------------------------------------------------------|
| What questions would you ask to know the consumption of food, liquids and supplements before, during and after a competition? | C. Consumption of food, liquids and supplements, before, during and after the competition | C1. Questions referring to consumption of food, liquids and supplements 1 hour before the competition from the point of view of expert dietitians-nutritionists | C1.1 Solid food                                                  | C1.1.1 Details of the name, quantity, size and brand of the food or supplement consumed. |
|                                                                                                                               |                                                                                           |                                                                                                                                                                 | C1.2 Liquids                                                     | C1.2.1 Detail of amount consumed and brand in case of commercial drink                   |
|                                                                                                                               |                                                                                           |                                                                                                                                                                 | C1.3 Supplements                                                 | C1.3.1 Detail of the supplement consumed specifying quantity and brand                   |
|                                                                                                                               |                                                                                           | C2. Questions referring to consumption of food, liquids and supplements during the competition from the point of view of expert dietitians-nutritionists        | C2.1 Consumption of solid/semi-solid food during the competition | C2.1.1 Yes                                                                               |
|                                                                                                                               |                                                                                           |                                                                                                                                                                 |                                                                  | C2.1.2 No                                                                                |
|                                                                                                                               |                                                                                           |                                                                                                                                                                 | C2.2 Solid food                                                  | C2.1.1 Fruits                                                                            |
|                                                                                                                               |                                                                                           |                                                                                                                                                                 |                                                                  | C2.1.2 Dried fruits                                                                      |
|                                                                                                                               |                                                                                           |                                                                                                                                                                 |                                                                  | C2.1.3 Homemade energy bars                                                              |
|                                                                                                                               |                                                                                           |                                                                                                                                                                 |                                                                  | C2.1.4 Commercial energy bars or commercial Jellys                                       |
|                                                                                                                               |                                                                                           |                                                                                                                                                                 |                                                                  | C2.1.5 Others                                                                            |
|                                                                                                                               |                                                                                           |                                                                                                                                                                 | C2.3 Gels consumption during the competition                     | C2.3.1 Yes                                                                               |
|                                                                                                                               |                                                                                           |                                                                                                                                                                 |                                                                  | C2.3.2 No                                                                                |
|                                                                                                                               |                                                                                           |                                                                                                                                                                 | C2.4 Quantity of gels consumed during the competition            | C2.4 Units number                                                                        |
|                                                                                                                               |                                                                                           |                                                                                                                                                                 | C2.5 Type of gel                                                 | C2.5.1 Detail of the name of the product, brand and quantity                             |
|                                                                                                                               |                                                                                           |                                                                                                                                                                 | C2.6 Drinks consumption during the competition                   | C2.6.1 Yes                                                                               |
|                                                                                                                               |                                                                                           |                                                                                                                                                                 |                                                                  | C2.6.2 No                                                                                |
|                                                                                                                               |                                                                                           |                                                                                                                                                                 | C2.7 Drinks                                                      | C2.7.1 Water                                                                             |
|                                                                                                                               |                                                                                           |                                                                                                                                                                 |                                                                  | C2.7.2 Refreshment                                                                       |
|                                                                                                                               |                                                                                           |                                                                                                                                                                 |                                                                  | C2.7.3 Coffee/Infusions                                                                  |
|                                                                                                                               |                                                                                           |                                                                                                                                                                 |                                                                  | C2.7.4 Soups                                                                             |
|                                                                                                                               |                                                                                           |                                                                                                                                                                 |                                                                  | C2.7.5 Replacement drinks (or isotonic of for athletes)                                  |
|                                                                                                                               |                                                                                           | C3. Questions referring to Consumption of food, liquids and supplements 1 hour after the competition from the point of view of expert dietitians-nutritionists  | C3.1 Solid food                                                  | C3.1.1 Details of the name, quantity, size and brand of the food or supplement consumed. |
|                                                                                                                               |                                                                                           |                                                                                                                                                                 | C3.2 Liquids                                                     | C3.2.1 Detail of amount consumed and brand in case of commercial drink                   |
|                                                                                                                               |                                                                                           |                                                                                                                                                                 | C3.3 Supplements                                                 | C3.3.1 Detail of the supplement consumed specifying quantity and brand                   |

|  |  |                                                                                                                                              |                                                                  |                                                                                          |
|--|--|----------------------------------------------------------------------------------------------------------------------------------------------|------------------------------------------------------------------|------------------------------------------------------------------------------------------|
|  |  | C4. Questions referring to consumption of food, liquids and supplements 1 hour before the competition from the point of view of the athletes | C4.1 Solid food                                                  | C4.1.1 Details of the name, quantity, size and brand of the food or supplement consumed. |
|  |  |                                                                                                                                              | C4.2 Liquids                                                     | C4.2.1 Detail of amount consumed and brand in case of commercial drink                   |
|  |  |                                                                                                                                              | C4.3 Supplements                                                 | C4.3.1 Detail of the supplement consumed specifying quantity and brand                   |
|  |  | C5. Questions referring to consumption of food, liquids and supplements during the competition from the point of view of the athletes        | C5.1 Consumption of solid/semi-solid food during the competition | C5.1.1 Yes                                                                               |
|  |  |                                                                                                                                              |                                                                  | C5.1.2 No                                                                                |
|  |  |                                                                                                                                              | C5.2 Solid food                                                  | C5.2.1 Fruits                                                                            |
|  |  |                                                                                                                                              |                                                                  | C5.2.2 Dried fruits                                                                      |
|  |  |                                                                                                                                              |                                                                  | C5.2.3 Homemade energy bars                                                              |
|  |  |                                                                                                                                              |                                                                  | C5.2.4 Commercial energy bars or commercial Jellys                                       |
|  |  |                                                                                                                                              |                                                                  | C5.2.5 Others                                                                            |
|  |  |                                                                                                                                              | C5.3 Gels consumption during the competition                     | C5.3.1 Yes                                                                               |
|  |  |                                                                                                                                              |                                                                  | C5.3.2 No                                                                                |
|  |  |                                                                                                                                              | C5.4 Quantity of gels consumed during the competition            | C5.4 Units number                                                                        |
|  |  |                                                                                                                                              | C5.5 Type of gel                                                 | C5.5.1 Detail of the name of the product, brand and quantity                             |
|  |  |                                                                                                                                              | C5.6 Drinks consumption during the competition                   | C5.6.1 Yes                                                                               |
|  |  |                                                                                                                                              |                                                                  | C5.6.2 No                                                                                |
|  |  |                                                                                                                                              | C5.7 Drinks                                                      | C5.7.1 Water                                                                             |
|  |  |                                                                                                                                              |                                                                  | C5.7.2 Refreshment                                                                       |
|  |  |                                                                                                                                              |                                                                  | C5.7.3 Coffee/Infusions                                                                  |
|  |  |                                                                                                                                              |                                                                  | C5.7.4 Soups                                                                             |
|  |  |                                                                                                                                              |                                                                  | C5.7.5 Replacement drinks (or isotonic of for athletes)                                  |
|  |  | C6. Questions referring to consumption of food, liquids and supplements 1 hour after the competition from the point of view of the athletes  | C6.1 Solid food                                                  | C6.1.1 Details of the name, quantity, size and brand of the food or supplement consumed. |
|  |  |                                                                                                                                              | C6.2 Liquids                                                     | C6.2.1 Detail of amount consumed and brand in case of commercial drink                   |
|  |  |                                                                                                                                              | C6.3 Supplements                                                 | C6.3.1 Detail of the supplement consumed specifying quantity and brand                   |

Table S5. Map of codes and coherencies of Gastrointestinal complaints for the proposal for online questionnaire validation for endurance events.

| RESEARCH QUESTIONS                                                                                              | THEME                          | METACODES                                                                                                        | CODES                                                                                                                        | SUBCODES                                                                           |
|-----------------------------------------------------------------------------------------------------------------|--------------------------------|------------------------------------------------------------------------------------------------------------------|------------------------------------------------------------------------------------------------------------------------------|------------------------------------------------------------------------------------|
| What questions would you ask to find out about the gastrointestinal complaints that can occur in a competition? | D. Gastrointestinal complaints | D1. Questions referring to gastrointestinal complaints from the point of view of expert dietitians-nutritionists | D1.1 Diagnosis of any food allergy or intolerance                                                                            | D1.1.1 Yes                                                                         |
|                                                                                                                 |                                |                                                                                                                  |                                                                                                                              | D1.1.2 No                                                                          |
|                                                                                                                 |                                |                                                                                                                  | D1.2 Allergy or food intolerance                                                                                             | D1.2.1 Name of allergy or food intolerance                                         |
|                                                                                                                 |                                |                                                                                                                  | D1.3 Gastrointestinal discomfort or complaint during the test                                                                | D1.3.1 Yes                                                                         |
|                                                                                                                 |                                |                                                                                                                  |                                                                                                                              | D1.3.2 No                                                                          |
|                                                                                                                 |                                |                                                                                                                  | D1.4 Type of discomfort                                                                                                      | D1.4.1 Belch                                                                       |
|                                                                                                                 |                                |                                                                                                                  |                                                                                                                              | D1.4.2 Heartburn                                                                   |
|                                                                                                                 |                                |                                                                                                                  |                                                                                                                              | D1.4.3 Swelling                                                                    |
|                                                                                                                 |                                |                                                                                                                  |                                                                                                                              | D1.4.4 Stomachache                                                                 |
|                                                                                                                 |                                |                                                                                                                  |                                                                                                                              | D1.4.5 Urge to regurgitate                                                         |
|                                                                                                                 |                                |                                                                                                                  |                                                                                                                              | D1.4.6 Regurgitation                                                               |
|                                                                                                                 |                                |                                                                                                                  |                                                                                                                              | D1.4.7 Gases                                                                       |
|                                                                                                                 |                                |                                                                                                                  |                                                                                                                              | D1.4.8 Vomits                                                                      |
|                                                                                                                 |                                |                                                                                                                  |                                                                                                                              | D1.4.9 Urge to defecate                                                            |
|                                                                                                                 |                                |                                                                                                                  |                                                                                                                              | D1.4.10 Left intestinal pain                                                       |
|                                                                                                                 |                                |                                                                                                                  |                                                                                                                              | D1.4.11 Right intestinal pain                                                      |
|                                                                                                                 |                                |                                                                                                                  |                                                                                                                              | D1.4.12 Defecation: Normal consistency                                             |
|                                                                                                                 |                                |                                                                                                                  |                                                                                                                              | D1.4.13 Defecation: abnormal loose feces                                           |
|                                                                                                                 |                                |                                                                                                                  |                                                                                                                              | D1.4.14 Defecation: diarrhea                                                       |
|                                                                                                                 |                                |                                                                                                                  |                                                                                                                              | D1.4.15 Defecation: bloody feces                                                   |
|                                                                                                                 |                                |                                                                                                                  |                                                                                                                              | D1.4.16 Nausea                                                                     |
|                                                                                                                 |                                |                                                                                                                  |                                                                                                                              | D1.4.17 Dizziness                                                                  |
|                                                                                                                 |                                |                                                                                                                  |                                                                                                                              | D1.4.18 Acute transient abdominal pain                                             |
|                                                                                                                 |                                | D2. Questions referring to gastrointestinal complaints from the point of view of athletes                        | D1.5 Gastrointestinal discomfort/problem during the test is related to the consumption of any food, liquid or supplement     | D1.5.1 Yes                                                                         |
|                                                                                                                 |                                |                                                                                                                  |                                                                                                                              | D1.5.2 No                                                                          |
|                                                                                                                 |                                |                                                                                                                  | D1.6 In case of discomfort, the type of food that causes it En caso de presentar malestar, tipo de alimento que lo ocasiona. | D1.6.1 Examples of foods that can cause gastro-intestinal discomfort/problems      |
|                                                                                                                 |                                |                                                                                                                  | D1.7 Reasons or reasons why it could have happened                                                                           | D1.7.1 Explanation and detail of the reasons or reasons why it could have happened |
|                                                                                                                 |                                |                                                                                                                  | D2.1 Diagnosis of any food allergy or intolerance                                                                            | D2.1.1 Yes                                                                         |
|                                                                                                                 |                                |                                                                                                                  |                                                                                                                              | D2.1.2 No                                                                          |
|                                                                                                                 |                                |                                                                                                                  | D2.2 Allergy or food intolerance                                                                                             | D2.2.1 Name of allergy or food intolerance                                         |
|                                                                                                                 |                                |                                                                                                                  | D2.3 Gastrointestinal discomfort or complaint during the test                                                                | D2.3.1 Yes                                                                         |
|                                                                                                                 |                                |                                                                                                                  |                                                                                                                              | D2.3.2 No                                                                          |
|                                                                                                                 |                                |                                                                                                                  | D2.4 Type of discomfort                                                                                                      | D2.4.1 Belch                                                                       |
|                                                                                                                 |                                |                                                                                                                  |                                                                                                                              | D2.4.2 Heartburn                                                                   |
|                                                                                                                 |                                |                                                                                                                  |                                                                                                                              | D2.4.3 Swelling                                                                    |
|                                                                                                                 |                                |                                                                                                                  |                                                                                                                              | D2.4.4 Stomachache                                                                 |



|  |  |  |                                                                                                                              |                                                                                    |
|--|--|--|------------------------------------------------------------------------------------------------------------------------------|------------------------------------------------------------------------------------|
|  |  |  |                                                                                                                              | D2.4.5 Urge to regurgitate                                                         |
|  |  |  |                                                                                                                              | D2.4.6 Regurgitation                                                               |
|  |  |  |                                                                                                                              | D2.4.7 Gases                                                                       |
|  |  |  |                                                                                                                              | D2.4.8 Vomits                                                                      |
|  |  |  |                                                                                                                              | D2.4.9 Urge to defecate                                                            |
|  |  |  |                                                                                                                              | D2.4.10 Left intestinal pain                                                       |
|  |  |  |                                                                                                                              | D2.4.11 Right intestinal pain                                                      |
|  |  |  |                                                                                                                              | D2.4.12 Defecation: Normal consistency                                             |
|  |  |  |                                                                                                                              | D2.4.13 Defecation: abnormal loose feces                                           |
|  |  |  |                                                                                                                              | D2.4.14 Defecation: diarrhea                                                       |
|  |  |  |                                                                                                                              | D2.4.15 Defecation: bloody feces                                                   |
|  |  |  |                                                                                                                              | D2.4.16 Nausea                                                                     |
|  |  |  |                                                                                                                              | D2.4.17 Dizziness                                                                  |
|  |  |  |                                                                                                                              | D2.4.18 Acute transient abdominal pain                                             |
|  |  |  | D2.5 Gastrointestinal discomfort/problem during the test is related to the consumption of any food, liquid or supplement     | D2.5.1 Yes                                                                         |
|  |  |  |                                                                                                                              | D2.5.2 No                                                                          |
|  |  |  | D2.6 In case of discomfort, the type of food that causes it En caso de presentar malestar, tipo de alimento que lo ocasiona. | D2.6.1 Examples of foods that can cause gastro-intestinal discomfort/problems      |
|  |  |  | D2.7 Reasons or reasons why it could have happened                                                                           | D2.7.1 Explanation and detail of the reasons or reasons why it could have happened |

Table S6. Map of codes and coherencies of Planning of the test at the dietary-nutritional level for the proposal for online questionnaire validation for endurance events.

| RESEARCH QUESTIONS                                                                                          | THEME                                                           | METACODES                                                                                                                     | CODES                                                                                                                               | SUBCODES                    |
|-------------------------------------------------------------------------------------------------------------|-----------------------------------------------------------------|-------------------------------------------------------------------------------------------------------------------------------|-------------------------------------------------------------------------------------------------------------------------------------|-----------------------------|
| What questions would you ask to find out about the dietary and nutritional planning prior to a competition? | E. Planning of the competition at the dietary-nutritional level | E1. Questions referring to planning of the dietary-nutritional test from the point of view of expert dietitians-nutritionists | E1.1 Special preparation (training sessions for the gastrointestinal tract, specific diet days before, etc...) for this competition | E1.1.1 Yes                  |
|                                                                                                             |                                                                 |                                                                                                                               |                                                                                                                                     | E1.1.2 No                   |
|                                                                                                             |                                                                 |                                                                                                                               | E1.2 Previous planning of the dietary-nutritional strategy for the competition                                                      | E1.2.1 Yes                  |
|                                                                                                             |                                                                 |                                                                                                                               |                                                                                                                                     | E1.2.2 No                   |
|                                                                                                             |                                                                 |                                                                                                                               | E1.3 Nutritional advice received by a professional before the competition                                                           | E1.3.1 Dietist-nutricionist |
|                                                                                                             |                                                                 |                                                                                                                               |                                                                                                                                     | E1.3.2 Physician/Doctor     |
|                                                                                                             |                                                                 |                                                                                                                               |                                                                                                                                     | E1.3.3 Coach                |
|                                                                                                             |                                                                 |                                                                                                                               |                                                                                                                                     | E1.3.4 Nurse                |
|                                                                                                             |                                                                 |                                                                                                                               |                                                                                                                                     | E1.3.5 Pharmacist           |
|                                                                                                             |                                                                 |                                                                                                                               |                                                                                                                                     | E1.3.6 Friend/family        |
|                                                                                                             |                                                                 |                                                                                                                               |                                                                                                                                     | E1.3.7 Web/Internet         |
|                                                                                                             |                                                                 |                                                                                                                               |                                                                                                                                     | E1.3.8 Physiotherapist      |
|                                                                                                             |                                                                 |                                                                                                                               |                                                                                                                                     | E1.3.9 None                 |
|                                                                                                             |                                                                 |                                                                                                                               |                                                                                                                                     | E1.3.10 Other               |
|                                                                                                             |                                                                 | E2. Questions referring to planning of the dietary-nutritional test from the point of view of athletes                        | E2.1 Special preparation (training sessions for the gastrointestinal tract, specific diet days before, etc...) for this competition | E2.1.1 Yes                  |
|                                                                                                             |                                                                 |                                                                                                                               |                                                                                                                                     | E2.1.2 No                   |
|                                                                                                             |                                                                 |                                                                                                                               | E2.2 Previous planning of the dietary-nutritional strategy for the competition                                                      | E2.2.1 Yes                  |
|                                                                                                             |                                                                 |                                                                                                                               |                                                                                                                                     | E2.2.2 No                   |
|                                                                                                             |                                                                 |                                                                                                                               | E2.3 Nutritional advice received by a professional before the competition                                                           | E2.3.1 Dietist-nutricionist |
|                                                                                                             |                                                                 |                                                                                                                               |                                                                                                                                     | E2.3.2 Physician/Doctor     |
|                                                                                                             |                                                                 |                                                                                                                               |                                                                                                                                     | E2.3.3 Coach                |
|                                                                                                             |                                                                 |                                                                                                                               |                                                                                                                                     | E2.3.4 Nurse                |
|                                                                                                             |                                                                 |                                                                                                                               |                                                                                                                                     | E2.3.5 Pharmacist           |
|                                                                                                             |                                                                 |                                                                                                                               |                                                                                                                                     | E2.3.6 Friend/family        |
|                                                                                                             |                                                                 |                                                                                                                               |                                                                                                                                     | E2.3.7 Web/Internet         |
|                                                                                                             |                                                                 |                                                                                                                               |                                                                                                                                     | E2.3.8 Physiotherapist      |
|                                                                                                             |                                                                 |                                                                                                                               |                                                                                                                                     | E2.3.9 None                 |
|                                                                                                             |                                                                 |                                                                                                                               |                                                                                                                                     | E2.3.10 Other               |
